# Supplementary material for: Integrated analysis reveals common DNA methylation patterns of alcohol-associated cancers: A pan-cancer analysis
Source: Front Genet. 2023 Feb 13;14:1032683. doi: 10.3389/fgene.2023.1032683 (PMC9968750; doi:10.3389/fgene.2023.1032683)
Supplement: Supplementary file 1 [file Table2.XLSX]

## Sheet: Aging-associated DMPs
Table S2 Differential methylated probes between the young group(<65 yrs.) and the old(>=65 yrs.) group patients
Cancertype	DMP	logFC	AveExpr	t	P.Value	adj.P.Val	B	young_AVG	old_AVG	deltaBeta	CHR	MAPINFO	Strand	Type	gene	feature	cgi	feat.cgi	UCSC_CpG_Islands_Name	DHS	Enhancer	Phantom	Probe_SNPs	Probe_SNPs_10
ESCA	cg17144149	0.25266	0.570958	6.24475	6.55575e-09	0.00132752	9.53811	0.682791	0.430132	-0.25266	17	46656572	F	II	HOXB4	TSS1500	shore	TSS1500-shore	chr17:46655215-46655604	TRUE				rs41308592
ESCA	cg10953655	0.183056	0.392334	6.22102	7.35221e-09	0.00132752	9.42574	0.473359	0.290303	-0.183056	17	46656664	R	II	HOXB4	TSS1500	shore	TSS1500-shore	chr17:46655215-46655604	TRUE
ESCA	cg21984532	0.123766	0.448994	5.55998	1.64115e-07	0.0159195	6.39026	0.503775	0.380009	-0.123766	7	130789927	F	I	FLJ43663	Body	shore	Body-shore	chr7:130790358-130792773
ESCA	cg12570134	0.179347	0.686901	5.54422	1.76334e-07	0.0159195	6.32027	0.766284	0.586938	-0.179347	17	46640347	F	II	HOXB3	5'UTR	shore	5'UTR-shore	chr17:46641534-46642110				rs76034280
ESCA	cg02132714	0.244738	0.591334	5.38832	3.56705e-07	0.0257628	5.63427	0.69966	0.454922	-0.244738	17	46656690	F	I	HOXB4	TSS1500	shore	TSS1500-shore	chr17:46655215-46655604	TRUE
ESCA	cg05527785	0.219539	0.379445	5.32126	4.8131e-07	0.0289361	5.34288	0.476618	0.257079	-0.219539	17	46656543	F	II	HOXB4	TSS1500	shore	TSS1500-shore	chr17:46655215-46655604	TRUE			rs41308592
ESCA	cg07110801	0.148934	0.496986	5.28683	5.60897e-07	0.0289361	5.19414	0.562907	0.413973	-0.148934	16	89623711	R	II	SPG7	3'UTR	shelf	3'UTR-shelf	chr16:89626644-89627869	TRUE				rs78984164
ESCA	cg13584258	0.110618	0.58441	5.23408	7.0831e-07	0.0319733	4.96743	0.633372	0.522754	-0.110618	9	92040726	F	II	SEMA4D	5'UTR	opensea	5'UTR-opensea			TRUE
ESCA	cg14588642	0.156508	0.325523	5.19871	8.27648e-07	0.0332091	4.81623	0.394797	0.238289	-0.156508	11	67139423	R	II	LOC100130987	Body	shore	Body-shore	chr11:67139887-67141146		TRUE
ESCA	cg03715305	0.110295	0.637254	5.11	1.21984e-06	0.0360444	4.43984	0.686073	0.575777	-0.110295	19	5894715	R	II	NDUFA11	3'UTR	shelf	3'UTR-shelf	chr19:5892110-5892472
ESCA	cg04434593	0.228509	0.372082	5.1039	1.2526e-06	0.0360444	4.41413	0.473225	0.244716	-0.228509	11	67139546	R	I	LOC100130987	Body	shore	Body-shore	chr11:67139887-67141146		TRUE
ESCA	cg03968755	-0.177536	0.374951	-5.08962	1.33277e-06	0.0360444	4.35398	0.296369	0.473905	0.177536	4	85418816	R	II	NKX6-1	1stExon	island	1stExon-island	chr4:85417659-85420799	TRUE	TRUE
ESCA	cg16096432	0.111413	0.598696	5.08406	1.36529e-06	0.0360444	4.33061	0.648011	0.536597	-0.111413	1	54776890	F	II	SSBP3	Body	opensea	Body-opensea		TRUE	TRUE
ESCA	cg17573933	0.0914647	0.535014	5.0609	1.50943e-06	0.0360444	4.23331	0.575498	0.484034	-0.0914647	17	46623780	F	II	HOXB2	TSS1500	shelf	TSS1500-shelf	chr17:46620367-46621373
ESCA	cg22242842	0.216719	0.447889	5.05275	1.56357e-06	0.0360444	4.19915	0.543814	0.327095	-0.216719	2	85167149	R	I		IGR	opensea	IGR-opensea			TRUE			rs72838114
ESCA	cg21180956	-0.143043	0.337971	-5.04785	1.59699e-06	0.0360444	4.17866	0.274658	0.4177	0.143043	5	54281478	R	II	ESM1	TSS200	opensea	TSS200-opensea			TRUE
ESCA	cg25255850	0.137948	0.526111	5.0186	1.81172e-06	0.0367631	4.05642	0.58717	0.449222	-0.137948	17	46625332	R	II		IGR	shelf	IGR-shelf	chr17:46627787-46628444
ESCA	cg17086398	0.111707	0.569179	5.01595	1.83244e-06	0.0367631	4.04541	0.618623	0.506916	-0.111707	1	31896392	R	II	SERINC2	Body	opensea	Body-opensea
ESCA	cg18633600	-0.0707124	0.197374	-4.9787	2.1503e-06	0.0408695	3.8905	0.166075	0.236787	0.0707124	12	1940452	F	II	LRTM2	Body	opensea	Body-opensea		TRUE	TRUE			rs11836031
ESCA	cg06942183	0.178591	0.43599	4.94778	2.45435e-06	0.0435143	3.76247	0.515038	0.336447	-0.178591	17	46622607	R	II	HOXB2	TSS1500	shore	TSS1500-shore	chr17:46620367-46621373	TRUE
ESCA	cg04064583	0.126043	0.18249	4.94062	2.53045e-06	0.0435143	3.73292	0.23828	0.112237	-0.126043	4	89028557	R	II	ABCG2	Body	opensea	Body-opensea			TRUE
HNSC	cg12663656	-0.0132204	0.033497	-5.46254	8.98566e-08	0.0324496	6.40894	0.0291537	0.0423741	0.0132204	12	120427667	F	I	CCDC64	1stExon	island	1stExon-island	chr12:120426547-120428066			high-CpG:118911181-118912104
LIHC	cg12216208	-0.227936	0.383637	-5.68101	9.97361e-08	0.036017	6.89169	0.281259	0.509195	0.227936	12	6756377	F	I	ACRBP	Body	island	Body-island	chr12:6756001-6756679	TRUE
LIHC	cg14036479	-0.103701	0.179055	-5.45219	2.81316e-07	0.0436697	5.88084	0.132478	0.236179	0.103701	7	155250220	F	II	EN2	TSS1500	island	TSS1500-island	chr7:155246390-155251955
LIHC	cg04643822	-0.211955	0.312335	-5.39529	3.62782e-07	0.0436697	5.63327	0.217135	0.429089	0.211955	4	82965250	R	I		IGR	shore	IGR-shore	chr4:82965415-82965896
LIHC	cg03192163	-0.193913	0.153338	-5.30561	5.4005e-07	0.0487561	5.24627	0.0662408	0.260154	0.193913	6	137365300	R	II	IL20RA	Body	island	Body-island	chr6:137365299-137366126	TRUE
