# Supplementary material for: Integrated analysis reveals common DNA methylation patterns of alcohol-associated cancers: A pan-cancer analysis
Source: Front Genet. 2023 Feb 13;14:1032683. doi: 10.3389/fgene.2023.1032683 (PMC9968750; doi:10.3389/fgene.2023.1032683)
Supplement: Supplementary file 4 [file Table1.XLSX]

## Sheet: Result Supp GSE validation
Table SI Validation of DMPs in GSE123781
DMP	CHR	MAPINFO	gene	feature	cgi	UCSC_CpG_Islands_Name	Enhancer
cg04021697	1	3567303	WDR8	TSS1500	island	chr1:3566445-3569636
cg16823083	1	3567412	WDR8	TSS1500	island	chr1:3566445-3569636
cg06829686	1	47910843		IGR	island	chr1:47909712-47911020	TRUE
cg17941572	1	63784454		IGR	island	chr1:63782394-63790471
cg06962177	1	63785946		IGR	island	chr1:63782394-63790471
cg18279094	1	63790044	FOXD3	1stExon	island	chr1:63782394-63790471
cg08146483	1	75602412	LHX8	Body	island	chr1:75601998-75602878
cg11823511	1	91183697	BARHL2	TSS1500	island	chr1:91183240-91184540
cg22167515	1	91192466		IGR	island	chr1:91190489-91192804
cg18786873	1	110610899	ALX3	Body	island	chr1:110610265-110613303	TRUE
cg06215569	1	110611465	ALX3	Body	island	chr1:110610265-110613303	TRUE
cg20302133	1	111217194	KCNA3	1stExon	island	chr1:111216244-111217937
cg11595545	1	111217497	KCNA3	1stExon	island	chr1:111216244-111217937
cg10703826	1	119532116	TBX15	1stExon	island	chr1:119531991-119532196	TRUE
cg01959730	1	119548825		IGR	shore	chr1:119549144-119551320
cg21908235	1	146551744		IGR	island	chr1:146551476-146551764
cg16269733	1	156616804	BCAN	Body	island	chr1:156616553-156616946
cg06445348	1	166917009	ILDR2	Body	island	chr1:166916865-166917215
cg07149609	1	170630734		IGR	island	chr1:170630456-170630851
cg24932457	1	175568559	TNR	5'UTR	island	chr1:175568376-175568808
cg13300273	1	200842890	GPR25	1stExon	island	chr1:200842196-200843388	TRUE
cg07790615	1	237205174	RYR2	TSS1500	island	chr1:237205126-237206644
cg07533148	1	248020812	TRIM58	1stExon	island	chr1:248020330-248021252
cg09799983	2	38301756	CYP1B1	Body	island	chr2:38301276-38304518
cg03714619	2	45160445		IGR	shore	chr2:45161427-45163058
cg19186145	2	45169562	SIX3	1stExon	island	chr2:45169505-45171884
cg00097146	2	45171818	SIX3	Body	island	chr2:45169505-45171884
cg21185289	2	74743437	TLX2	3'UTR	island	chr2:74740455-74743795
cg26210445	2	162273326	TBR1	1stExon	island	chr2:162273294-162273725
cg23161999	2	162283189		IGR	shore	chr2:162283581-162284677	TRUE
cg14118515	2	176948728	EVX2	TSS200	shore	chr2:176949511-176949795
cg02694427	2	176964512	HOXD12	TSS200	island	chr2:176964062-176965509
cg05167251	2	176987465	HOXD9	5'UTR	island	chr2:176986424-176988291	TRUE
cg05864326	2	177030150	HOXD3	5'UTR	shore	chr2:177029413-177029941
cg13356896	2	198650987	BOLL	TSS200	island	chr2:198649751-198651599
cg25740565	2	200335101	FLJ32063	Body	shore	chr2:200335497-200336413
cg10168149	2	200335558	FLJ32063	Body	island	chr2:200335497-200336413
cg22399133	2	208989248	CRYGD	1stExon	island	chr2:208988834-208989269
cg18249634	3	32860467	TRIM71	Body	island	chr3:32858194-32860506
cg18862481	3	129693370	TRH	5'UTR	island	chr3:129693127-129694841
cg11940285	3	129693385	TRH	5'UTR	island	chr3:129693127-129694841
cg00334063	3	147106010	ZIC4	3'UTR	shelf	chr3:147108511-147111703
cg26790247	3	147108512	ZIC4	Body	island	chr3:147108511-147111703
cg16768018	3	147108843	ZIC4	Body	island	chr3:147108511-147111703
cg01227537	3	147127012	ZIC1	TSS200	island	chr3:147126988-147128999
cg27642784	3	157813670		IGR	shore	chr3:157815581-157816095
cg05937737	3	170303540	SLC7A14	5'UTR	island	chr3:170303532-170303768
cg21884231	3	170303721	SLC7A14	5'UTR	island	chr3:170303532-170303768
cg15092343	4	4860061	MSX1	TSS1500	island	chr4:4859632-4860191
cg21538208	4	4864488	MSX1	Body	island	chr4:4864456-4864834
cg04597433	4	9783206	DRD5	TSS200	island	chr4:9783035-9784960
cg12973941	4	13545639	NKX3-2	1stExon	island	chr4:13543562-13546494
cg19852958	4	13545760	NKX3-2	1stExon	island	chr4:13543562-13546494
cg05036656	4	41875470		IGR	island	chr4:41875445-41875794	TRUE
cg13427361	4	187650301		IGR	shelf	chr4:187644319-187648253
cg17712694	5	16180068	2021-03-11	TSS200	island	chr5:16179064-16180420
cg16150752	5	16180072	2021-03-11	TSS200	island	chr5:16179064-16180420
cg14979301	5	42994123		IGR	shore	chr5:42994626-42994936
cg09048251	5	77253974		IGR	island	chr5:77253832-77254049
cg06572465	5	140800929	PCDHGA4	Body	island	chr5:140800760-140801072
cg21627409	5	140810106	PCDHGA4	Body	shore	chr5:140810494-140812617
cg02452944	5	140810109	PCDHGA4	Body	shore	chr5:140810494-140812617
cg12304520	5	140810123	PCDHGA4	Body	shore	chr5:140810494-140812617
cg09639151	5	140810920	PCDHGA4	Body	island	chr5:140810494-140812617
cg23244790	5	140811102	PCDHGA4	Body	island	chr5:140810494-140812617
cg00582971	5	178422128	GRM6	TSS200	island	chr5:178421225-178422337	TRUE
cg17403609	5	180075862	FLT4	Body	island	chr5:180075688-180076906
cg01518607	6	27235891		IGR	opensea
cg12172441	6	28176163		IGR	shore	chr6:28175282-28175605
cg18243760	6	32116780	PRRT1	3'UTR	island	chr6:32116590-32117229
cg06122871	6	85476210		IGR	shelf	chr6:85472702-85474132
cg06793562	6	85482570		IGR	island	chr6:85482569-85484718
cg08445802	6	85482612		IGR	island	chr6:85482569-85484718
cg17302155	6	100061111	PRDM13	Body	island	chr6:100060979-100062657
cg21063722	6	100911709	SIM1	TSS200	shore	chr6:100912071-100913337	TRUE
cg27252696	6	100912940	SIM1	TSS1500	island	chr6:100912071-100913337
cg17380661	6	100912946	SIM1	TSS1500	island	chr6:100912071-100913337
cg23746497	6	105388668		IGR	island	chr6:105388190-105389545
cg03738025	6	105388694		IGR	island	chr6:105388190-105389545
cg02391713	6	105400985		IGR	island	chr6:105400877-105401149
cg22620090	6	105400993		IGR	island	chr6:105400877-105401149
cg19980771	6	110798022	SLC22A16	TSS200	island	chr6:110797297-110798201
cg01972751	6	137814728	OLIG3	1stExon	island	chr6:137814355-137815202	TRUE
cg24028809	6	153414101	RGS17	5'UTR	opensea		TRUE
cg20928945	7	960411	ADAP1	Body	shore	chr7:959724-959959
cg01447112	7	6703803		IGR	island	chr7:6703503-6704075
cg05732750	7	6704045		IGR	island	chr7:6703503-6704075
cg01381846	7	27204785	HOXA9	1stExon	island	chr7:27203915-27206462
cg12600174	7	27205230	HOXA9	TSS200	island	chr7:27203915-27206462
cg20884887	7	27208285		IGR	shore	chr7:27208871-27209616
cg05311410	7	27225523	HOXA11AS	Body	island	chr7:27225050-27225629
cg15564098	7	27281346	EVX1	TSS1500	shore	chr7:27282086-27283136	TRUE
cg09765089	7	27291346		IGR	island	chr7:27291119-27292197	TRUE
cg18961681	7	32467657		IGR	island	chr7:32467434-32467948	TRUE
cg17985646	7	35293759	TBX20	TSS200	island	chr7:35292985-35294674
cg14249876	7	44143993	AEBP1	1stExon	opensea		TRUE
cg03817667	7	54609953	VSTM2A	TSS200	island	chr7:54609734-54610140
cg08315202	7	98246006	NPTX2	TSS1500	island	chr7:98245805-98247759
cg18952796	7	98246633	NPTX2	5'UTR	island	chr7:98245805-98247759
cg14646244	7	107300287	SLC26A4	TSS1500	shore	chr7:107301205-107302416
cg27393010	7	121940216		IGR	island	chr7:121940006-121940648
cg11213690	7	149112402		IGR	island	chr7:149112306-149112545
cg22743884	8	11839844	DEFB135	1stExon	opensea
cg10340048	8	74258684		IGR	opensea		TRUE
cg12176793	8	90624127		IGR	opensea		TRUE
cg14486338	8	99440279	KCNS2	Body	island	chr8:99438692-99440425
cg01581084	8	99961874	OSR2	Body	shore	chr8:99960497-99961438	TRUE
cg24848035	8	101118525	RGS22	TSS200	island	chr8:101117922-101118693	TRUE
cg20661138	8	145925314		IGR	shore	chr8:145925410-145926101
cg05099508	10	22634432	SPAG6	1stExon	island	chr10:22634000-22634862
cg17538572	10	94834763	CYP26A1	Body	island	chr10:94833272-94835256
cg02443967	10	98129902	TLL2	Body	opensea
cg18267049	10	101875028		IGR	island	chr10:101874821-101875139
cg03679755	10	101875035		IGR	island	chr10:101874821-101875139
cg25266629	10	102894148	TLX1	Body	island	chr10:102893660-102895059	TRUE
cg14861089	10	102895043	TLX1	Body	island	chr10:102893660-102895059
cg14038391	10	102900130		IGR	island	chr10:102899822-102900263
cg09165441	10	103044194		IGR	island	chr10:103043990-103044480
cg25209842	10	103536342	FGF8	TSS1500	island	chr10:103535636-103536505
cg18932798	10	105037503	INA	1stExon	island	chr10:105036628-105038084
cg08833577	10	118899288	VAX1	TSS1500	island	chr10:118899247-118900329
cg00806644	10	126889815		IGR	opensea		TRUE
cg14731462	10	129789429	PTPRE	5'UTR	opensea		TRUE
cg26730416	11	4233502		IGR	opensea
cg02027945	11	20618230		IGR	island	chr11:20618197-20619920
cg01939477	11	43602879	MIR129-2	TSS200	island	chr11:43602545-43603215
cg14699728	11	66188522	NPAS4	5'UTR	island	chr11:66188130-66189397
cg23727983	11	125774082	DDX25	TSS200	shore	chr11:125774292-125774584
cg01181415	12	16757954	LMO3	5'UTR	opensea
cg10143811	12	16757985	LMO3	5'UTR	opensea
cg13879483	12	95942907	USP44	TSS1500	island	chr12:95941906-95942979
cg20443254	12	108169020	ASCL4	1stExon	island	chr12:108168986-108169570	TRUE
cg09887059	12	113916664		IGR	island	chr12:113916433-113916717
cg08018585	13	46425866	SIAH3	TSS200	opensea		TRUE
cg19497031	13	79176272	POU4F1	Body	island	chr13:79175610-79177985	TRUE
cg18161327	13	100627703		IGR	shelf	chr13:100620241-100624348
cg00295794	13	100641409		IGR	island	chr13:100641334-100642188
cg22489321	13	100643388		IGR	shore	chr13:100641334-100642188
cg17494199	13	106834942		IGR	opensea		TRUE
cg25078444	14	29235193	FOXG1	TSS1500	island	chr14:29234889-29235908	TRUE
cg07489048	14	29236898	FOXG1	1stExon	island	chr14:29236835-29237832
cg05057720	14	38724675	CLEC14A	1stExon	island	chr14:38724254-38725537	TRUE
cg04701034	14	52536175	NID2	TSS1500	island	chr14:52534581-52536722
cg21039708	14	57278729	OTX2OS1	TSS1500	island	chr14:57278709-57279116
cg23322933	14	61109207		IGR	island	chr14:61108954-61109786
cg18103859	14	61110002		IGR	shore	chr14:61108954-61109786
cg05369857	14	101923702		IGR	island	chr14:101923575-101925995
cg19968840	15	45409319	DUOXA2	Body	island	chr15:45408573-45409528
cg19991916	15	55610624	PIGB	TSS1500	shore	chr15:55611085-55611608
cg16670554	15	68118985	LBXCOR1	Body	island	chr15:68115485-68122575	TRUE
cg02401454	16	230343	HBQ1	1stExon	island	chr16:230301-231761	TRUE
cg00970396	16	9107199		IGR	opensea
cg15811515	16	31580989	CSDAP1	TSS200	island	chr16:31580559-31581023
cg24613080	17	32484035	ACCN1	TSS1500	island	chr17:32484007-32484280	TRUE
cg14754787	17	35299600	LHX1	Body	island	chr17:35291899-35300875
cg19760241	17	35300010	LHX1	Body	island	chr17:35291899-35300875
cg19156875	17	43974446	MAPT	5'UTR	island	chr17:43971410-43975040
cg14002960	18	31739423	NOL4	Body	island	chr18:31739047-31739522	TRUE
cg27072996	19	822635	LPPR3	TSS1500	island	chr19:821345-822669
cg13703871	19	9473674	ZNF177	TSS200	island	chr19:9473589-9474001
cg08065231	19	9473684	ZNF177	TSS200	island	chr19:9473589-9474001
cg09578475	19	9473688	ZNF177	TSS200	island	chr19:9473589-9474001
cg09980058	19	18898325	COMP	Body	island	chr19:18898228-18898449
cg24909548	19	36736272		IGR	island	chr19:36736021-36736884	TRUE
cg18630667	19	37096323	ZNF529	TSS200	island	chr19:37095680-37096589
cg14587524	19	38183262	ZNF781	TSS200	island	chr19:38182793-38183327
cg06574716	19	44331239	ZNF283	TSS1500	opensea
cg11254700	19	53561386		IGR	island	chr19:53561215-53561812
cg11294513	19	58220295	ZNF154	Body	island	chr19:58220189-58220517
cg05661282	19	58220370	ZNF154	5'UTR	island	chr19:58220189-58220517
cg21790626	19	58220494	ZNF154	5'UTR	island	chr19:58220189-58220517
cg27049766	19	58220516	ZNF154	5'UTR	island	chr19:58220189-58220517
cg08668790	19	58220662	ZNF154	TSS200	shore	chr19:58220189-58220517
cg01268824	19	58220818	ZNF154	TSS1500	shore	chr19:58220189-58220517
cg24368848	19	58545160	ZSCAN1	TSS1500	island	chr19:58545115-58545897
cg14231297	19	58629901	ZSCAN18	TSS200	island	chr19:58629309-58630241
cg07113642	20	2781262	CPXM1	5'UTR	island	chr20:2780978-2781497
cg01408508	20	26188639		IGR	island	chr20:26188638-26190348
cg08304190	20	26188997	MIR663	TSS200	island	chr20:26188638-26190348
cg04150495	20	26190328	MIR663	TSS1500	island	chr20:26188638-26190348
cg20395967	20	26190347	MIR663	TSS1500	island	chr20:26188638-26190348
cg26132320	20	44640353	MMP9	Body	island	chr20:44640288-44641210
